# Supplementary material for: A Systematic Review and Meta-Analysis of Anti-Rheumatic Drugs and Pneumococcal Vaccine Immunogenicity in Inflammatory Arthritis
Source: MDPI journal article supplement (doi:10.3390/vaccines11111680), 2023-11-02
Supplement: s1 [file s1]

## Supplementary Material

**Table S1.** Studies included in the metaanalysis.

| Author, Year (ref) | Number of subjects (N)                               | Vaccine Intervention | Outcome                                                                                    | Age, years (mean, SD unless specified)                                       | % Female                                                          | SC %                                                                      | SP %                        | NOS |
|--------------------|------------------------------------------------------|----------------------|--------------------------------------------------------------------------------------------|------------------------------------------------------------------------------|-------------------------------------------------------------------|---------------------------------------------------------------------------|-----------------------------|-----|
| Bingham 2010       | Rituximab (68)<br>Methotrexate (32)                  | 23 valent            | ≥2-fold increase or an increase of 1 mcg/ml from pre vaccination level                     | RTX + MTX 49.7 (9.6)<br>MTX 49.7 (10.5)                                      | RTX + MTX (75)<br>MTX (78)                                        | RTX+MTX (57)<br>MTX (82)                                                  | -                           | 8   |
| Bingham 2015       | Tocilizumab & Methotrexate (60)<br>Methotrexate (31) | 23 Valent            | ≥2-fold increase or an increase of 1 mcg/ml from pre vaccination level, to ≥6/12 serotypes | TOC + MTX 51.1 (8.9)<br>MTX 51.4 (9.5)                                       | TOC+MTX (75.9)<br>MTX (81.5)                                      | TOC + MTX (60)<br>MTX (70.8)                                              | -                           | 8   |
| Elmer 2022         | Methotrexate (11)<br>HC (13)                         | 23 valent            | 2 fold increase in >6 of the antibody serotypes                                            | Median, IQR<br>MTX 62.9 (58.3-66.7)<br>HC 41.1 (35.9-56.5)                   | MTX (91)<br>HC (61.5)                                             | MTX (56)<br>HC (90)                                                       | -                           | 8   |
| Kaine 2007         | TNFi (99)<br>Control (109)                           | 23 valent            | SC = >2 fold tire increase in 3/5 antigens. SP = >1.6ul for 3/5 antigens                   | 51.7 (11.66)                                                                 | 79.8%                                                             | Placebo (37.4)<br>TNFi (40.4)                                             | Placebo (81.7)<br>TNFi 85.9 | 8   |
| Kapetanovic 2006   | TNFi (62 )<br>TNFi + MTX (50)<br>MTX (37)<br>HC (47) | 23 valent            | ≥ 2-fold or higher increase in 6b and 23f serotype                                         | Median, IQR<br>TNFi 53.7<br>TNF+MTX 52.8<br>MTX 61.3<br>HC 30.3              | TNFi (76)<br>TNFi + MTX (70)<br>MTX (68)<br>HC (74)               | TNFi (50)<br>TNFi + MTX (32)<br>MTX (13.5)<br>HC (38.2)                   | -                           | 8   |
| Kapetanovic 2011   | MTX (85)<br>TNF+MTX (89)<br>TNF (79)<br>Control (85) | 23 valent            | ARR ≥ 2, 4 to 6-weeks post-vaccination, serotypes 6b and 23f                               | MTX 61.5 (14)<br>TNFi + MTX 60.1 (10)<br>TNFi 59.8 (14)<br>Control 51.6 (12) | MTX: (78.8)<br>TNFi + MTX (77.5)<br>TNFi (87.3)<br>Control (45.3) | MTX 18 (21.2)<br>TNFi + MTX (15.7)<br>TNFi 29 (36.7)<br>Control 41 (47.7) | -                           | 8   |
| Kapetanovic 2013   | RTX ± MTX (55)<br>ABA ± MTX (17)<br>TOC ± MTX (16)   | PCV7                 | ARR ≥ 2, 4-6 weeks post-vaccination, serotypes 6b and 23f                                  | 60.2 (2.0)                                                                   | 74                                                                |                                                                           |                             | 8   |

|                  |                                                                              |           |                                                                                                                        |                                                                    |                                                                 |                                                                                                                                                                                                                  |   |   |
|------------------|------------------------------------------------------------------------------|-----------|------------------------------------------------------------------------------------------------------------------------|--------------------------------------------------------------------|-----------------------------------------------------------------|------------------------------------------------------------------------------------------------------------------------------------------------------------------------------------------------------------------|---|---|
| Kvitz 2014       | Placebo +/- MTX (110)<br>CZP+/- MTX (107)                                    | 23 valent | ≥ 2-fold increase<br>in ≥ 3 of 6<br>pneumococcal<br>antigens at 6<br>weeks, serotypes:<br>6b, 9v, 14, 18c, 19f,<br>23f | Placebo 52.7<br>(11.1)<br>CZP 53.1<br>(11.8)                       | Placebo<br>(76.3) CZP<br>(83.6)                                 | Placebo (62.5),<br>CZP (54.5)                                                                                                                                                                                    | - | 7 |
| Migita 2015      | MTX (55)<br>ABA (21)<br>Control (35)                                         | 23 valent | ≥2-fold increase in<br>IgG<br>concentrations of<br>6b or 23f<br>serotypes                                              | Control 70.5<br>(10.8)<br>MTX 63.8<br>(11.5)<br>ABA 59.8<br>(12.0) | Control<br>(65.7)<br>MTX (80)<br>ABA (81)                       | Fold increase<br>in GMT 6b<br>(95%CI)/23f<br>(95% CI) RA<br>control 2.38<br>(1.41 -<br>5.62)/3.36(1.85<br>to 9.42) MTX<br>1.75(1.15-3.11)/<br>2.00(1.27 to<br>5.48) ABA<br>1.41(0.87-3.09)/<br>2.45 (1.23- 7.44) | - | 8 |
| Visvanathan 2007 | IFX 3mg/kg<br>+MTX (20)<br>IFX 6mg/kg +<br>MTX (36)<br>Placebo + MTX<br>(14) | 23 valent | ≥ 2-fold increase<br>at least 6 vaccine<br>serotypes<br>compared to pre-<br>vaccine levels                             | Median,<br>IQR IFX<br>3mg/kg: 52<br>IFX 6mg/kg<br>50 Placebo<br>50 | IFX 3mg/kg<br>(65)<br>IFX 6mg/kg<br>(66.7)<br>Placebo<br>(78.6) | -                                                                                                                                                                                                                | 6 |   |

**Table S2.** Studies not included in the meta-analysis.

| Author , Year | Subjects (N)                                                                    | Vaccine            | Outcome                                                                                                                      | Age, years (mean, SD unless specified) | Female (%) | Vaccine Response (%)                                                                   | Comments                                                                                             |
|---------------|---------------------------------------------------------------------------------|--------------------|------------------------------------------------------------------------------------------------------------------------------|----------------------------------------|------------|----------------------------------------------------------------------------------------|------------------------------------------------------------------------------------------------------|
| Alten 2016    | ABA + MTX (115)<br>ABA(10)                                                      | 23 valent          | ≥2-fold increase in post-vaccination titres to ≥3 of 5 antigens and protective Ab levels of ≥1.6 mcg/mL to ≥3 of 5 antigens. | 45.7 (13.8)                            | 85.6       | 83.9 %                                                                                 | Serotypes measured 9V, 14, 18C, 19F, 23F. No comparator group                                        |
| Fischer 2015  | Corticosteroids (35)<br>Other (181)                                             | 23 valent          | SC = IGG 0.5ul in 4/6 serotypes at 4-8 weeks                                                                                 | Median, IQR 53.9 (43.3-65.7)           | 53.2       | 87%                                                                                    | 56 received PPV23, 141 observation arm. Systemic steroids give poor serological response to vaccine. |
| Garrido 2022  | Prednisolone (38),<br>thiopurine (28)<br>calcineurin inhibitor (25)<br>MMF (27) | PPSV13 + 23 valent | seroprotection at 4 months >1.3ug/ml rise in 70% of serotypes                                                                | 41 (26)                                | 53         | TNF (59)<br>Other biologics (45)<br>Il12-23 (43)<br>Rituximab (6)<br>Vedolizumab (70%) | combination therapy reduced seroprotection (44%). Rituximab gives poor humoral response (6%).        |

|                |                                                                                                                                                                                                              |              |                                                                                                                       |                                                                                                                 |                                                                              |                                                                                                                                                                                                      |                                                                                                              |
|----------------|--------------------------------------------------------------------------------------------------------------------------------------------------------------------------------------------------------------|--------------|-----------------------------------------------------------------------------------------------------------------------|-----------------------------------------------------------------------------------------------------------------|------------------------------------------------------------------------------|------------------------------------------------------------------------------------------------------------------------------------------------------------------------------------------------------|--------------------------------------------------------------------------------------------------------------|
|                | Other (4)<br>DMARD +<br>Other (3)<br>TNF (60)<br>IL12-23 (7)<br>Rituximab<br>(8)<br>Ocrelizumab<br>(11),<br>Tofacitinib<br>(3)<br>Seckukinum<br>ab (2)<br>Vedolizuma<br>b (10)<br>5-ASA (15)<br>Control (36) |              |                                                                                                                       |                                                                                                                 |                                                                              | 5-ASA (68)<br>DMARD<br>monotherapy (57)<br>DMARD + other<br>(54)                                                                                                                                     |                                                                                                              |
| Lee<br>2014    | 5ASA (37)<br>IM (70)<br>TNFi (40)<br>TNFi+IM<br>(50)                                                                                                                                                         | 23<br>valent | pre and post IgG<br>response 4 weeks                                                                                  | 5ASA 36.0<br>(19.0-65.0), IM<br>26.5 (24.0-<br>48.0), TNFi<br>32.0 (18.0-<br>48.0), TNFi+IM<br>30.5 (16.0-57.0) | ASA (79)<br>IM (52)<br>TNFi (74)<br>TNFi+IM<br>(64)                          | Fold increase: GMT<br>ASA 1.373 (1.298-<br>1.447), IM 1.368<br>(1.332-1.414), TNFi<br>1.249 (1.86-1.312),<br>TNFi+IM 1.275<br>(1.222-1.329)                                                          | Having both crohns<br>disease and being<br>medicated with a TNF<br>inhibitor hinder the<br>vaccine response. |
| Mease<br>2003  | MTX(83)<br>Corticosteroi<br>ds (22)<br>Etanercept<br>(94)                                                                                                                                                    | 23<br>valent | 2 and 4 fold<br>increase at 4 weeks<br>in 2 out of 5 from<br>9V, 14, 18C, 19F,<br>and 23F                             | 47 (18-76)                                                                                                      | 48                                                                           | 2 fold increase seen<br>in 67% of patients.<br>4 fold increase in<br>47%                                                                                                                             | Poor response in<br>MTX. Combined<br>TNFi and MTX not<br>worse than MTX<br>monotherapy.                      |
| Mori<br>2012   | MTX (62)<br>TOC + MTX<br>(54)<br>TOC (50)<br>Control 24                                                                                                                                                      | 23<br>valent | ≥2-fold in IgG<br>concentrations or<br>≥10- fold or more<br>increase in<br>opsonisation<br>indices                    | MTX 68.3<br>TOC + MTX<br>65.1<br>TOC 68.3<br>Control 69.2                                                       | MTX 51<br>(82.3),<br>TOC + MTX<br>(92.6)<br>TOC 43 (86)<br>Control<br>(79.2) | Fold increases<br>6b/23f (SD) MTX<br>1.5 (1.1-3.0)/ 2.6<br>(1.4-4.1 TOC + MTX<br>1.6 (1.2-1.9)/ 2.9<br>(1.0-6.9) TOC 2.8<br>(1.4-4.4)/ 3.4 (1.5-<br>6.8) Control 1.8<br>(1.3-3.7)/ 3.5 (1.7-<br>5.6) | Post-vaccination Ab<br>responses reduced<br>when TOC combined<br>with MTX.                                   |
| Mori<br>2022   | MTX( 10)<br>MTX+JAK(23<br>)<br>JAK (20)                                                                                                                                                                      | PCV13        | 2 fold increase in<br>IgG 4-6 weeks post<br>vaccination                                                               | MTX 60.0 (2.4),<br>JAKi 65.9(9.5),<br>MTX+JAKi<br>68.6 (8.0)                                                    | MTX( 90,,<br>JAKi (80),<br>MTX+JAKi<br>(73.9)                                | GMFI fold increase:<br>MTX 9.30(3.90-<br>22.20), JAKi 6.36<br>(4.48-8.85),<br>MTX+JAKi 3.46<br>(2.08-4.66)                                                                                           | MTX + JAKi has<br>reduced antibody<br>response (52.2%). JAK<br>alone does not impair<br>response (95%).      |
| O'dell<br>1996 | MTX (20)<br>Control (20)                                                                                                                                                                                     | 23<br>valent | Ab titres >300ng/ml<br>or ≥ 2-fold increase<br>compared to<br>prevaccine titres<br>Type 3, 7F, 9N and<br>14 serotypes | -                                                                                                               | 60                                                                           | Control response<br>(77)<br>MTX (50)                                                                                                                                                                 | MTX poor response<br>versus control group                                                                    |

|                  |                                       |              |                                                                                      |                                 |                       |                                                                                                                              |                                                                                                                                                                      |
|------------------|---------------------------------------|--------------|--------------------------------------------------------------------------------------|---------------------------------|-----------------------|------------------------------------------------------------------------------------------------------------------------------|----------------------------------------------------------------------------------------------------------------------------------------------------------------------|
| Racokz<br>i 2016 | ETA+MTX<br>(15)<br>ETA (7)<br>HC (24) | PCV13        | ARR $\geq 2$ , 4-weeks<br>post-vaccination                                           | RA 55.1 (10.4)<br>HC 63.9 (9.8) | ETA (77.3)<br>HC (75) | IgG levels 4 weeks<br>post vaccination:<br>ETA: 2.6-fold ( $\pm 1.5$ )<br>increase, HC 6.13-<br>fold ( $\pm 7.3$ ) increase. | Reduced response<br>rate in TNFi exposed<br>group compared to<br>HC. No significant<br>adverse effect of MTX<br>+ ETA combination<br>compared to ETA<br>monotherapy. |
| Tsuru<br>2014    | Tocilizumab<br>(21)                   | 23<br>valent | $\geq 2$ -fold increase in<br>Ab titres in at least<br>6 of 12 measured<br>serotypes | 54                              | 81                    | 100% patients<br>achieved adequate<br>Sero-response                                                                          | No comparator<br>group.                                                                                                                                              |
